# Supplementary material for: Aromatic pi-complexation of 1,5-diisocyanonaphthalene with benzene derivatives
Source: Research Square preprint supplement (doi:10.21203/rs.3.rs-5152817/v1), 2024-12-04
Supplement: Supplementary file 1 [file d4cebaed4bde23f53fd102cb.docx]

**Supplementary Information**

**for**

**Aromatic pi-complexation of 1,5-diisocyanonaphthalene with benzene derivatives.**

**Erika Kopcsik1, Zoltán Mucsi 1,2*, Bence Kontra2, Rajmond Schiwert1, László Vanyorek1, Béla Viskolcz1 and Miklós Nagy1,***

1Institute of Chemistry, University of Miskolc, Miskolc-Egyetemváros, Miskolc, Hungary 3515,

[ria.toth1@gmail.com](mailto:ria.toth1@gmail.com) (E.K.), [rajmond.sch@gmail.com](mailto:rajmond.sch@gmail.com) (R.S.), [bela.viskolcz@uni-miskolc.hu](mailto:bela.viskolcz@uni-miskolc.hu) (B.V.), [kemvanyi@uni-miskolc.hu](mailto:kemvanyi@uni-miskolc.hu) (L.V.)

2Department of Chemistry, Brain Vision Center, Liliom utca 43-45, 1094 Budapest, Hungary, kontrabence@gmail.com (B.K.)

*Correspondence: [zoltanmucsi@gmail.com](mailto:zoltanmucsi@gmail.com) (Z.M.), nagy.miklos@uni-miskolc.hu (M.N.);

Abstract: Aromatic π-complexes play a significant role in various chemical and biological systems, significantly influencing their physico-chemical and spectroscopic properties. The identification of new compounds capable of π-complex formation is therefore of great interest. The paper investigates the fluorescent properties of 1,5-diisocyanonaphthalene (1,5-DIN) in different aromatic solvents, demonstrating its potential for distinguishing between aromatics based on emission spectra. The resulting spectra can be classified as benzene-, toluene-, and xylene-like types and may be used for the fingerprint identification of benzenes with different electron donating/withdrawing substituents. Comparative studies with related compounds revealed that lower electron density in the naphthalene core favors π-complex formation. The study also found that electron-donating groups in solvents caused more significant redshifts, while electron-withdrawing groups had minimal impact. High-level DFT calculations supported these observations, showing that stronger π-π interactions lead to greater redshifts, particularly in solvents, such as toluene and xylenes. The research suggests that 1,5-DIN's distinct emission behaviors can be leveraged for compositional analysis of benzene-toluene-xylene (BTX) mixtures, with specific emphasis on the influence of electron density and solvent interactions on the emission properties. The demonstrated π-π interactions between 1,5-DIN and benzene derivatives may be utilized in the design of self-assembled systems, such as foldamers.

**Keywords:** naphthalene; fluorescence; solvatochromic effect; isonitrile; formamide; DFT

Table of contents

[Figure S1: UV-Vis absorbance spectrum of DIN recorded in benzene 3](#_Toc175927498)

[Figure S2: Emission spectrum of DIN recorded in benzene 3](#_Toc175927499)

[Figure S3: UV-Vis absorbance spectrum of DIN recorded in benzonitrile 4](#_Toc175927500)

[Figure S4: Emission spectrum of DIN recorded in benzonitrile 4](#_Toc175927501)

[Figure S5: UV-Vis absorbance spectrum of DIN recorded in benzyl alcohol 5](#_Toc175927502)

[Figure S6: Emission spectrum of DIN recorded in benzyl alcohol 5](#_Toc175927503)

[Figure S7: UV-Vis absorbance spectrum of DIN recorded in benzylamine 6](#_Toc175927504)

[Figure S8: Emission spectrum of DIN recorded in benzylamine 6](#_Toc175927505)

[Figure S9: UV-Vis absorbance spectrum of DIN recorded in benzyl chloride 7](#_Toc175927506)

[Figure S10: Emission spectrum of DIN recorded in benzyl chloride 7](#_Toc175927507)

[Figure S11: UV-Vis absorbance spectrum of DIN recorded in bromobenzene 8](#_Toc175927508)

[Figure S12: Emission spectrum of DIN recorded in bromobenzene 8](#_Toc175927509)

[Figure S13: UV-Vis absorbance spectrum of DIN recorded in chlorobenzene 9](#_Toc175927510)

[Figure S14: Emission spectrum of DIN recorded in chlorobenzene 9](#_Toc175927511)

[Figure S15: UV-Vis absorbance spectrum of DIN recorded in ethylbenzene 10](#_Toc175927512)

[Figure S16: Emission spectrum of DIN recorded in ethylbenzene 10](#_Toc175927513)

[Figure S17: UV-Vis absorbance spectrum of DIN recorded in m-xylene 11](#_Toc175927514)

[Figure S18: Emission spectrum of DIN recorded in m-xylene 11](#_Toc175927515)

[Figure S19: UV-Vis absorbance spectrum of DIN recorded in o-xylene 12](#_Toc175927516)

[Figure S20: Emission spectrum of DIN recorded in o-xylene 12](#_Toc175927517)

[Figure S21: UV-Vis absorbance spectrum of DIN recorded in p-xylene 13](#_Toc175927518)

[Figure S22: Emission spectrum of DIN recorded in p-xylene 13](#_Toc175927519)

[Figure S23: UV-Vis absorbance spectrum of DIN recorded in toluene 14](#_Toc175927520)

[Figure S24: Emission spectrum of DIN recorded in toluene 14](#_Toc175927521)


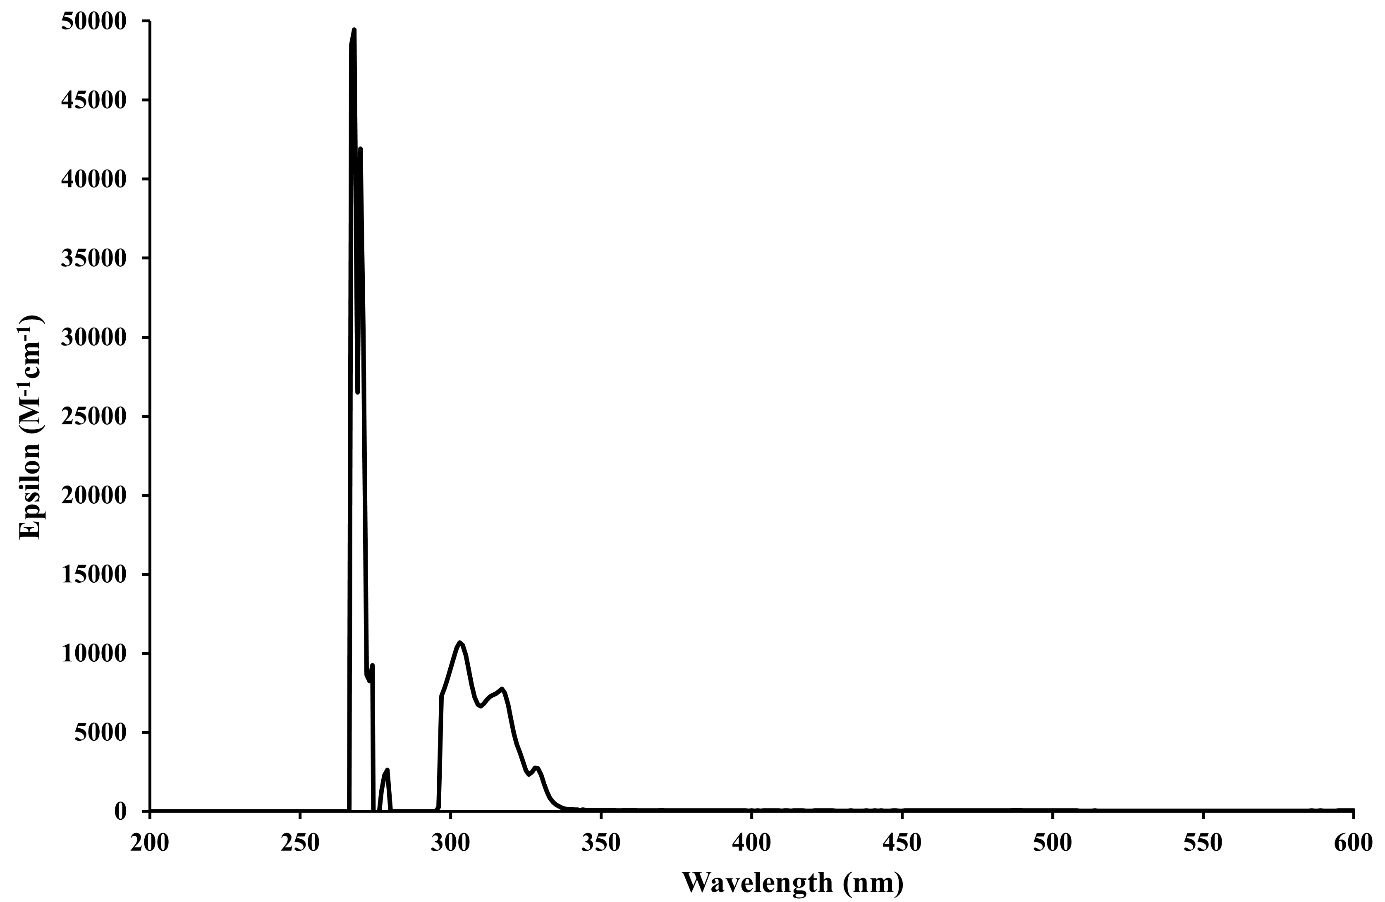


# Figure S1: UV-Vis absorbance spectrum of DIN recorded in benzene


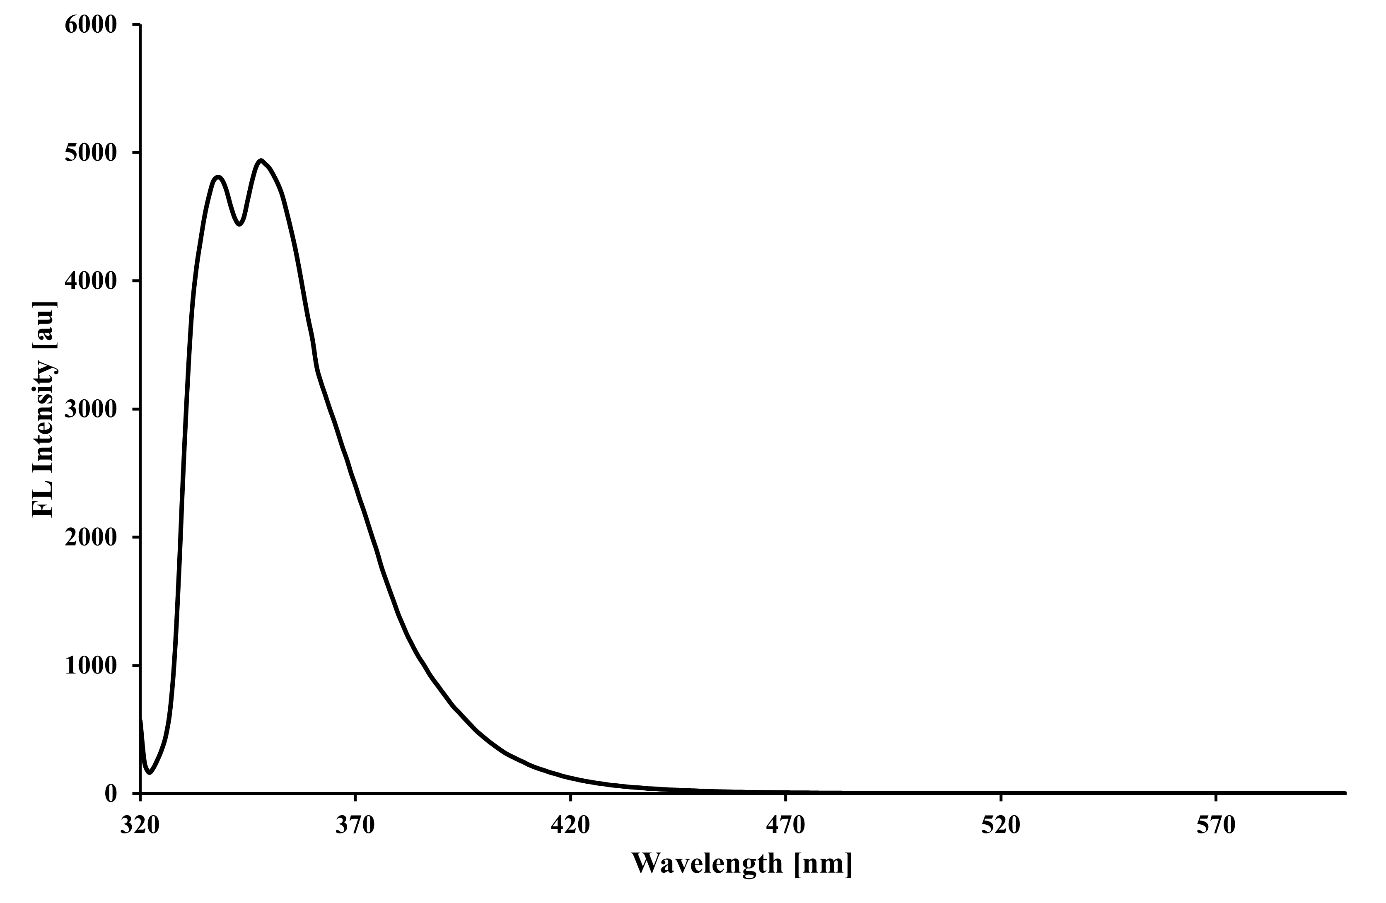


# Figure S2: Emission spectrum of DIN recorded in benzene


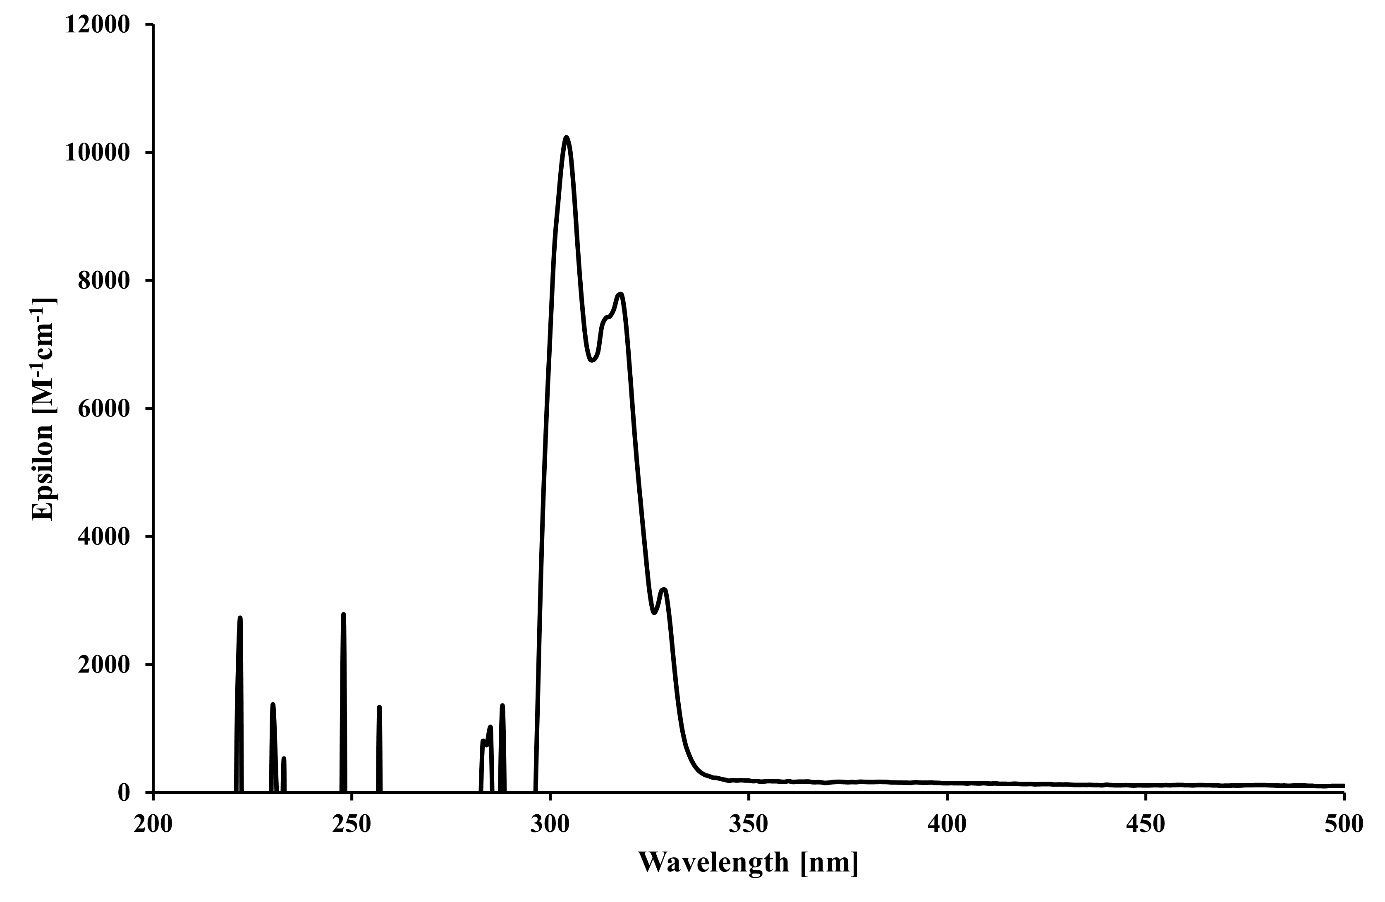


# Figure S3: UV-Vis absorbance spectrum of DIN recorded in benzonitrile


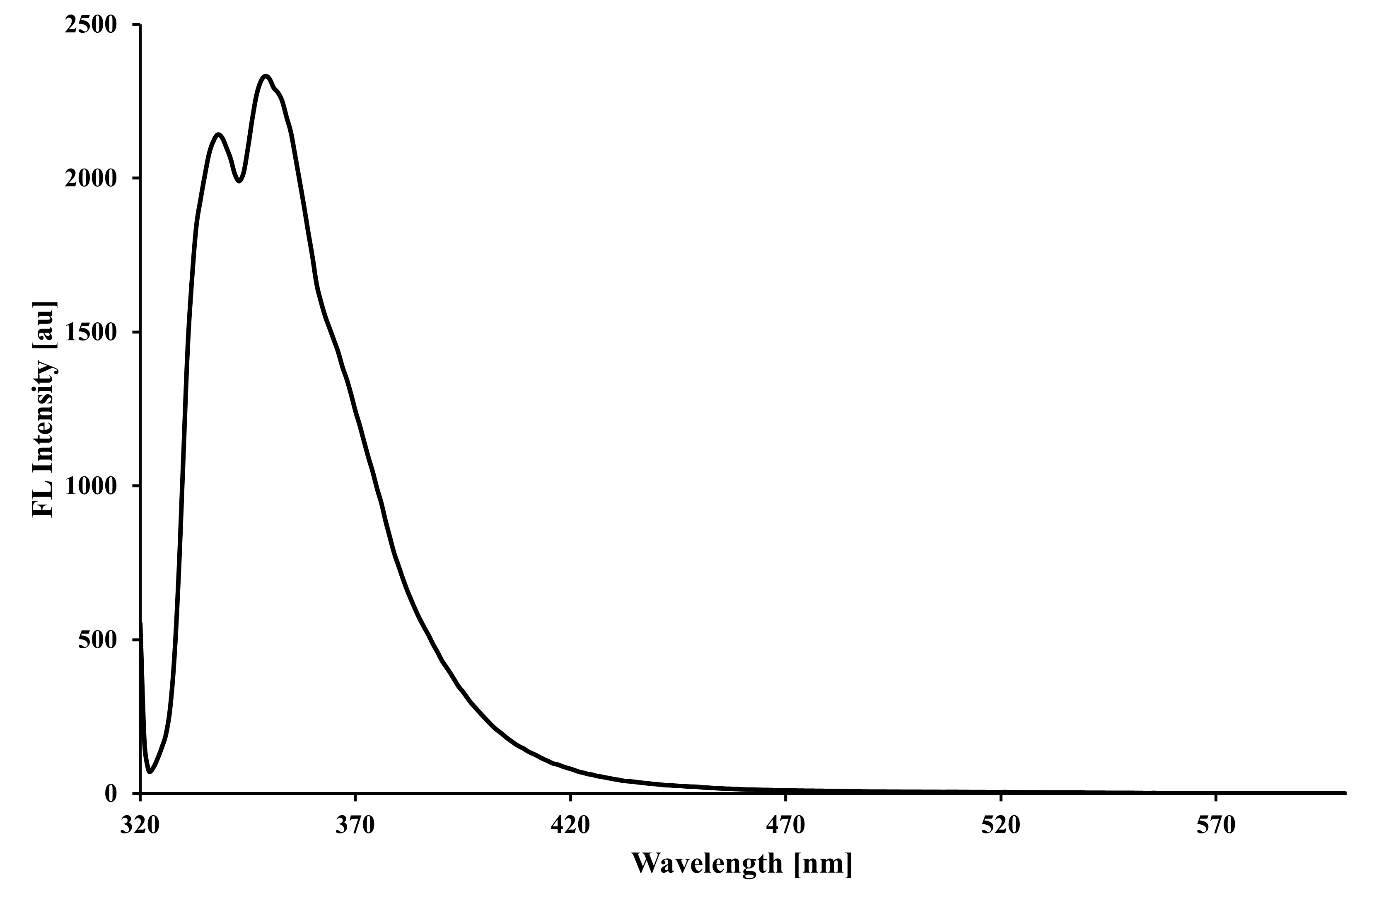


# Figure S4: Emission spectrum of DIN recorded in benzonitrile


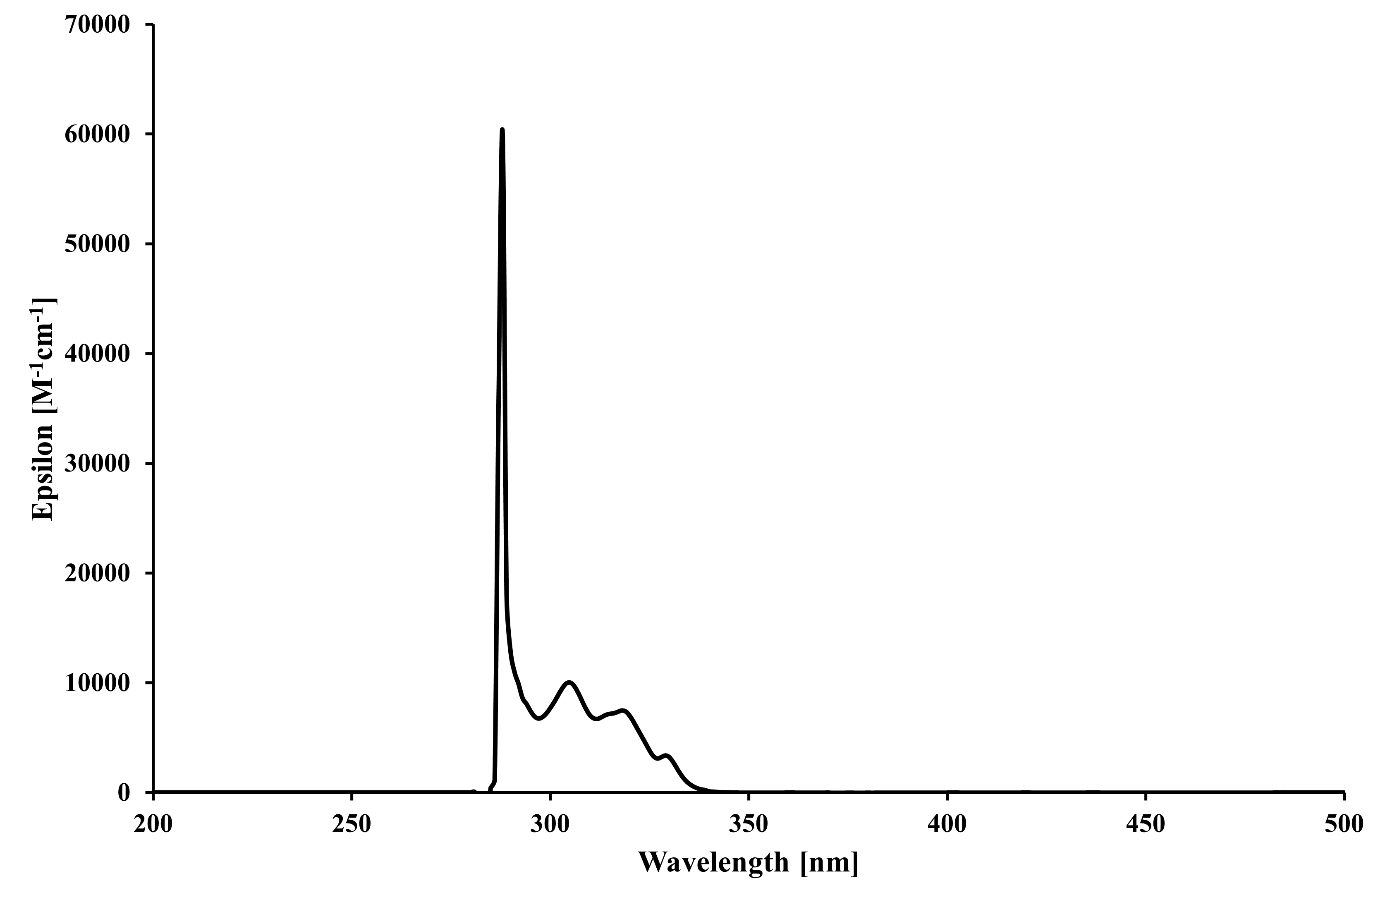


# Figure S5: UV-Vis absorbance spectrum of DIN recorded in benzyl alcohol


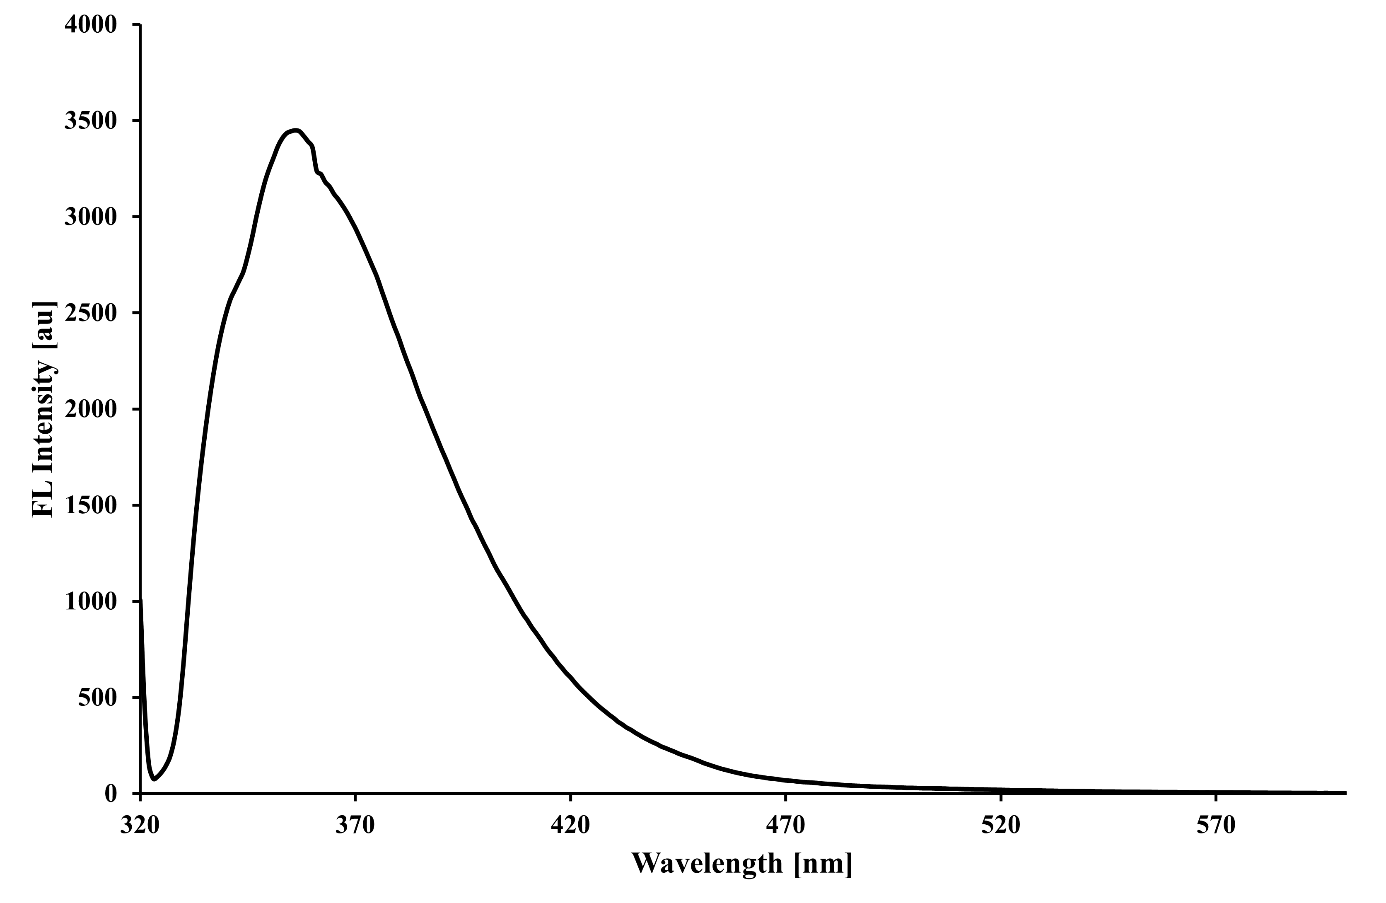


# Figure S6: Emission spectrum of DIN recorded in benzyl alcohol


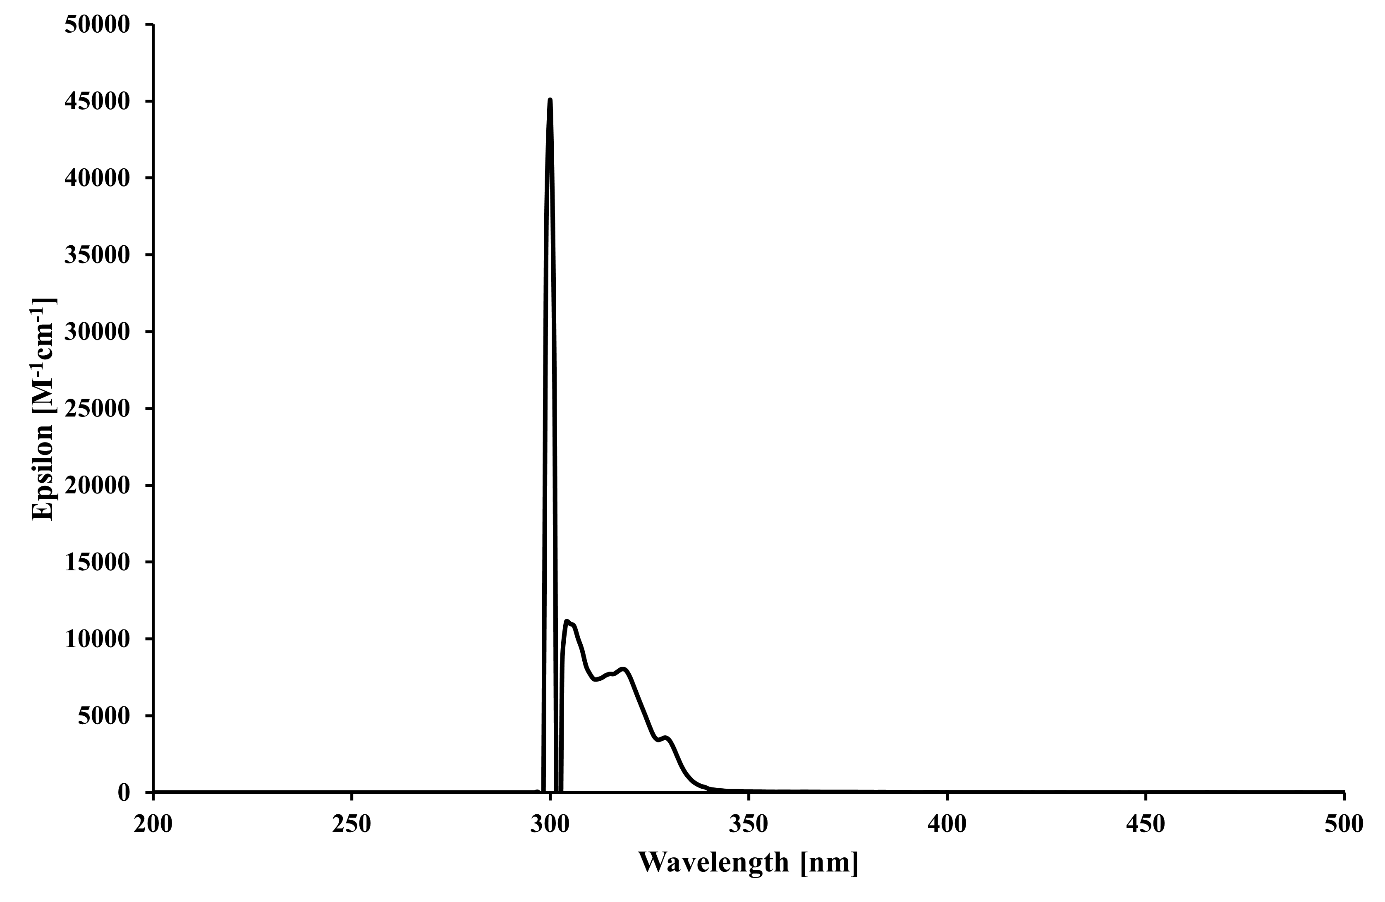


# Figure S7: UV-Vis absorbance spectrum of DIN recorded in benzylamine


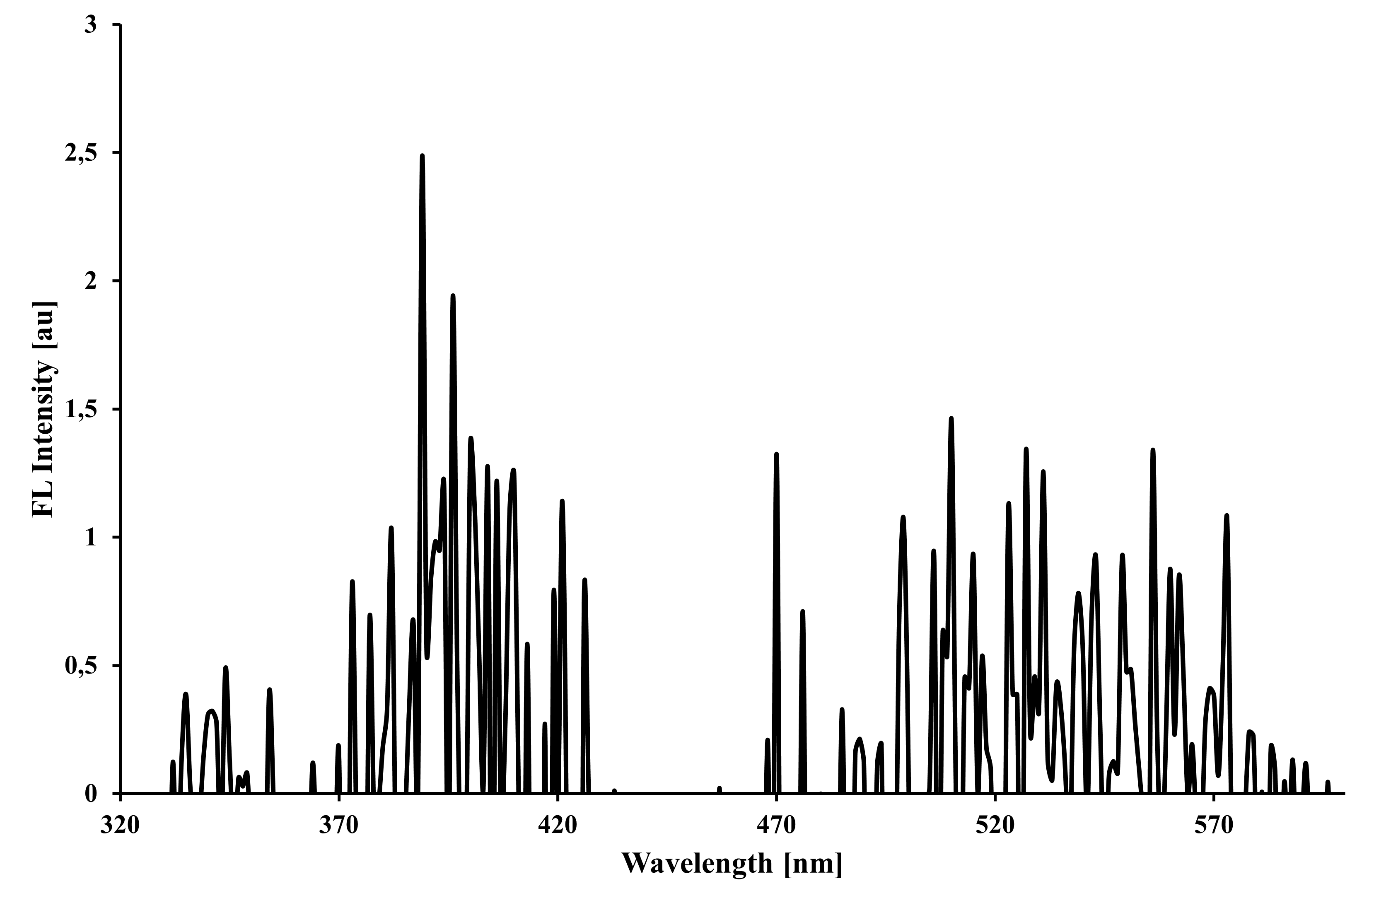


# Figure S8: Emission spectrum of DIN recorded in benzylamine


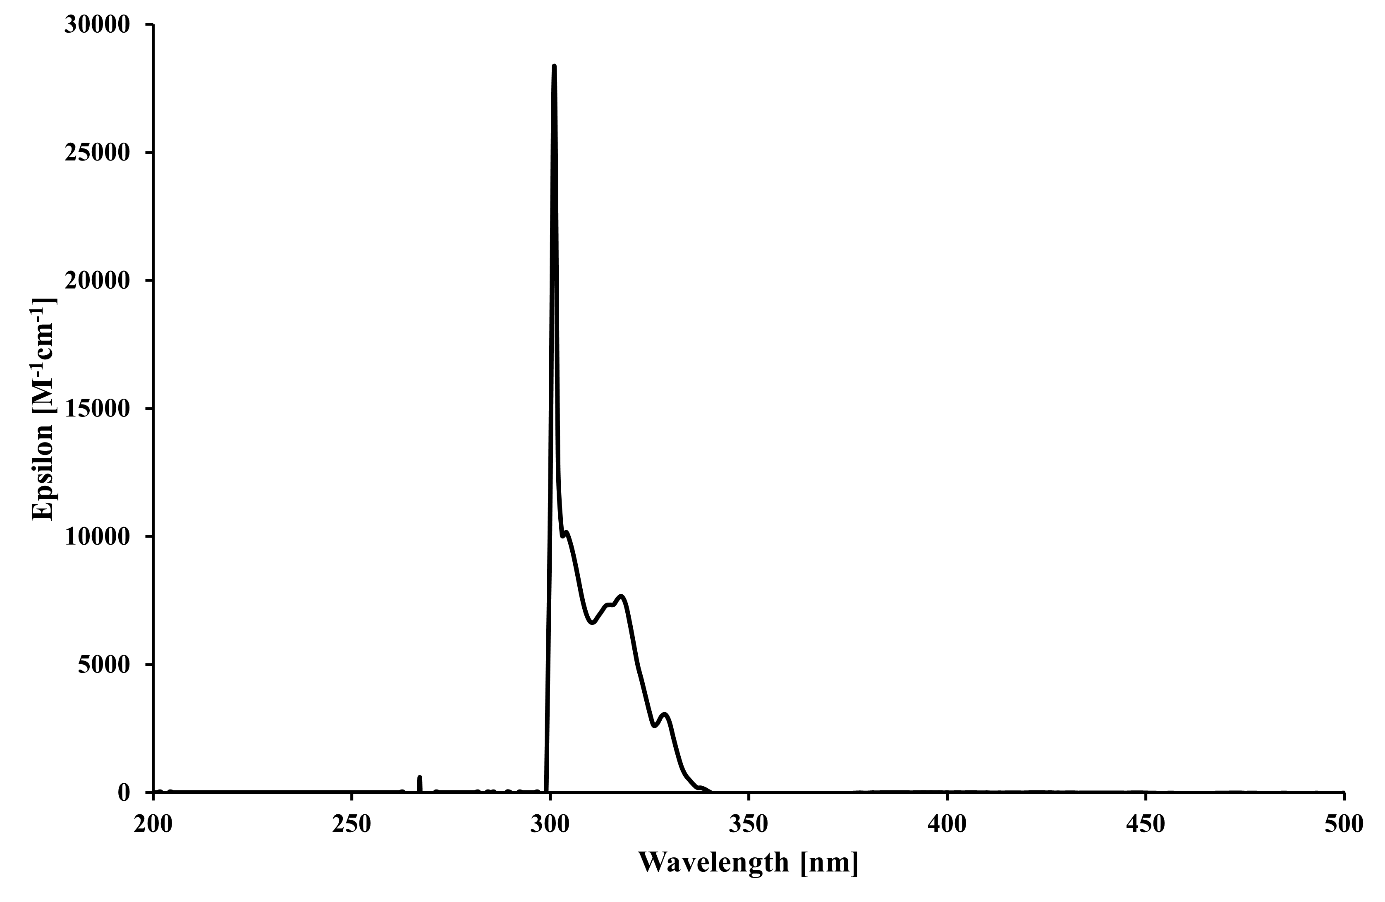


# Figure S9: UV-Vis absorbance spectrum of DIN recorded in benzyl chloride


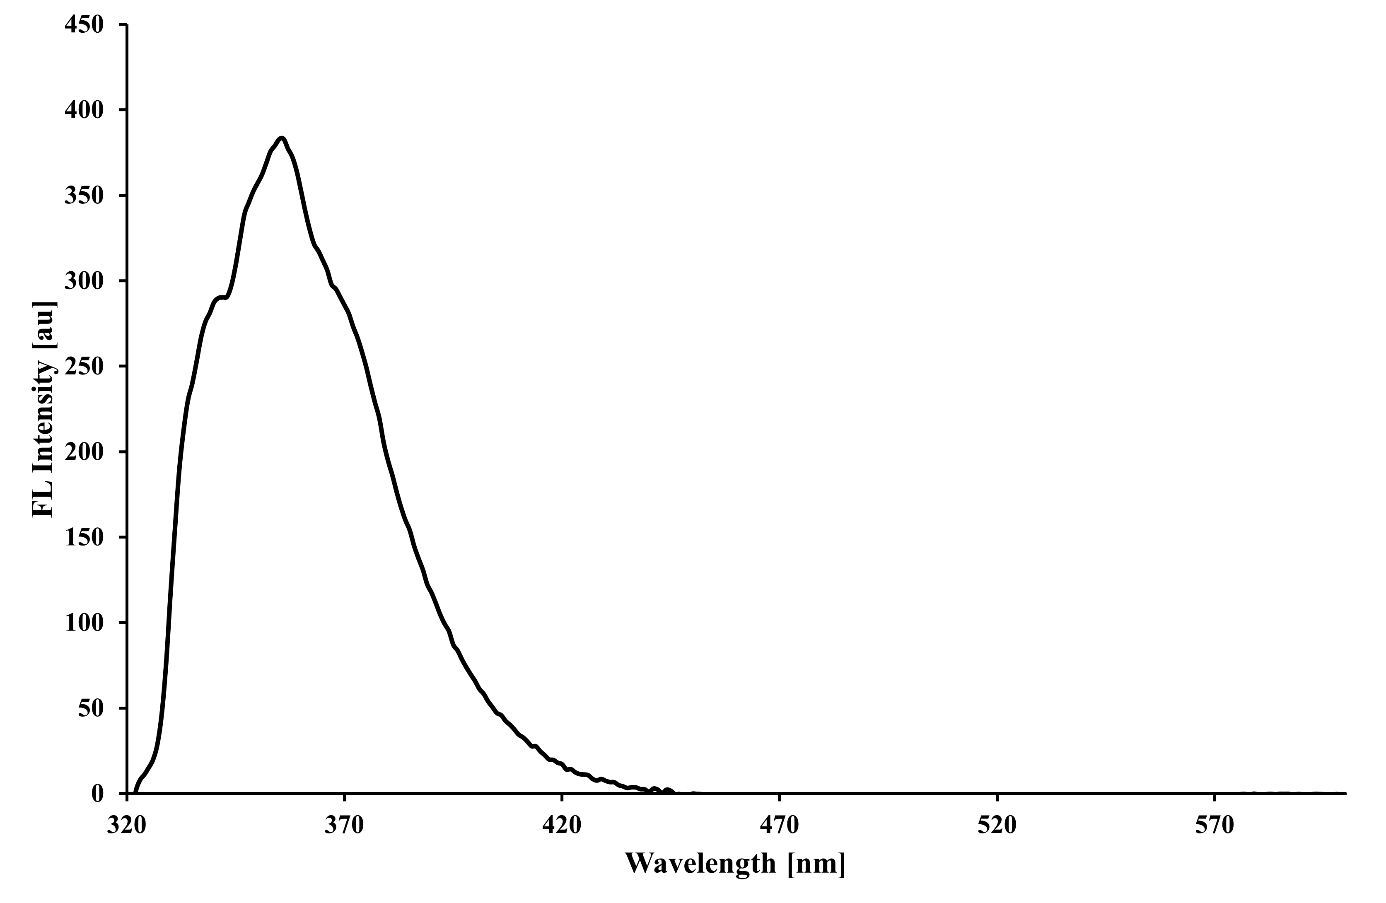


# Figure S10: Emission spectrum of DIN recorded in benzyl chloride


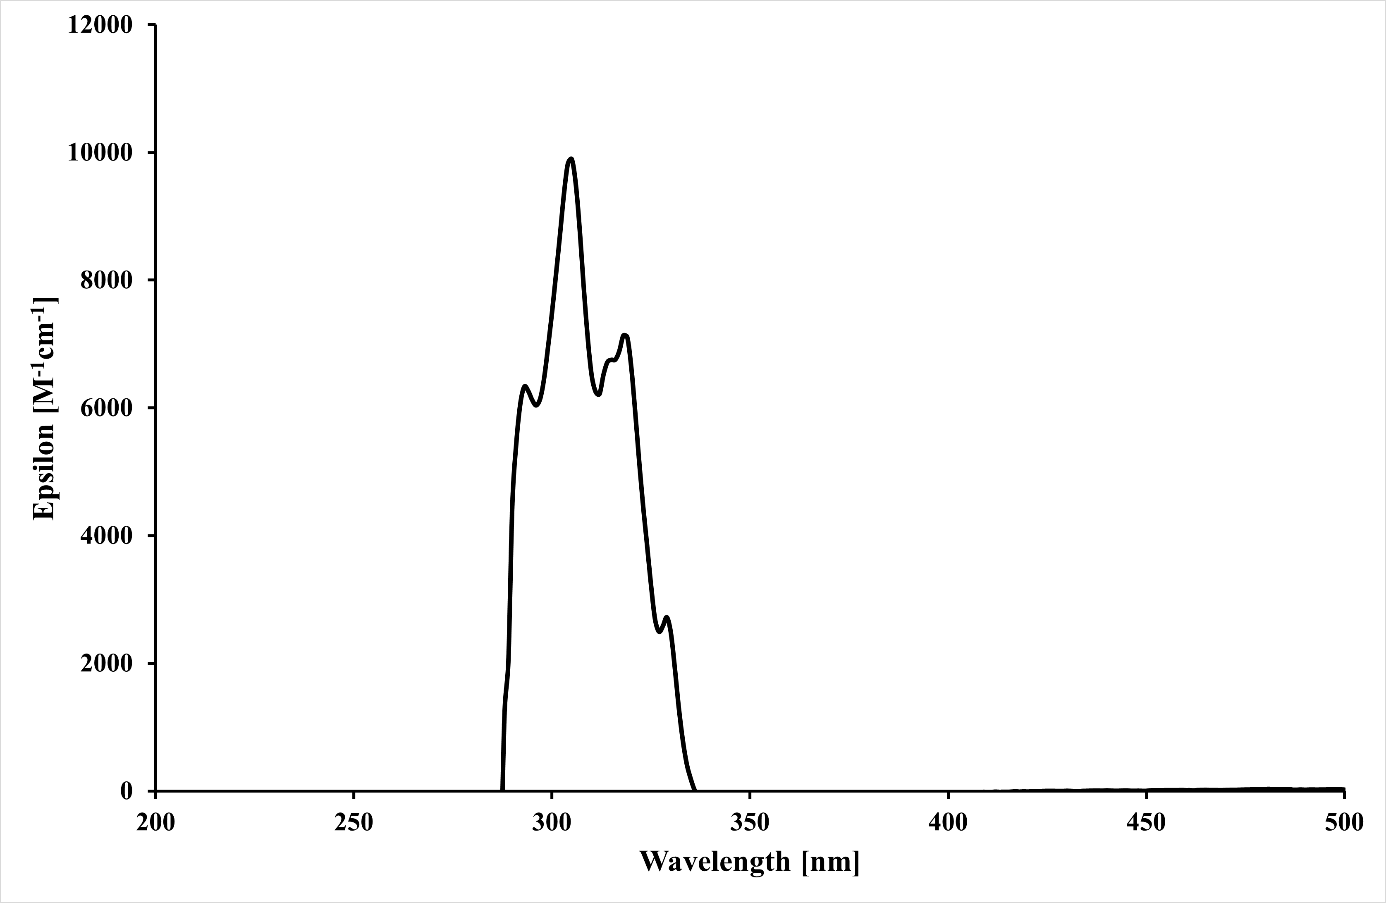


# Figure S11: UV-Vis absorbance spectrum of DIN recorded in bromobenzene


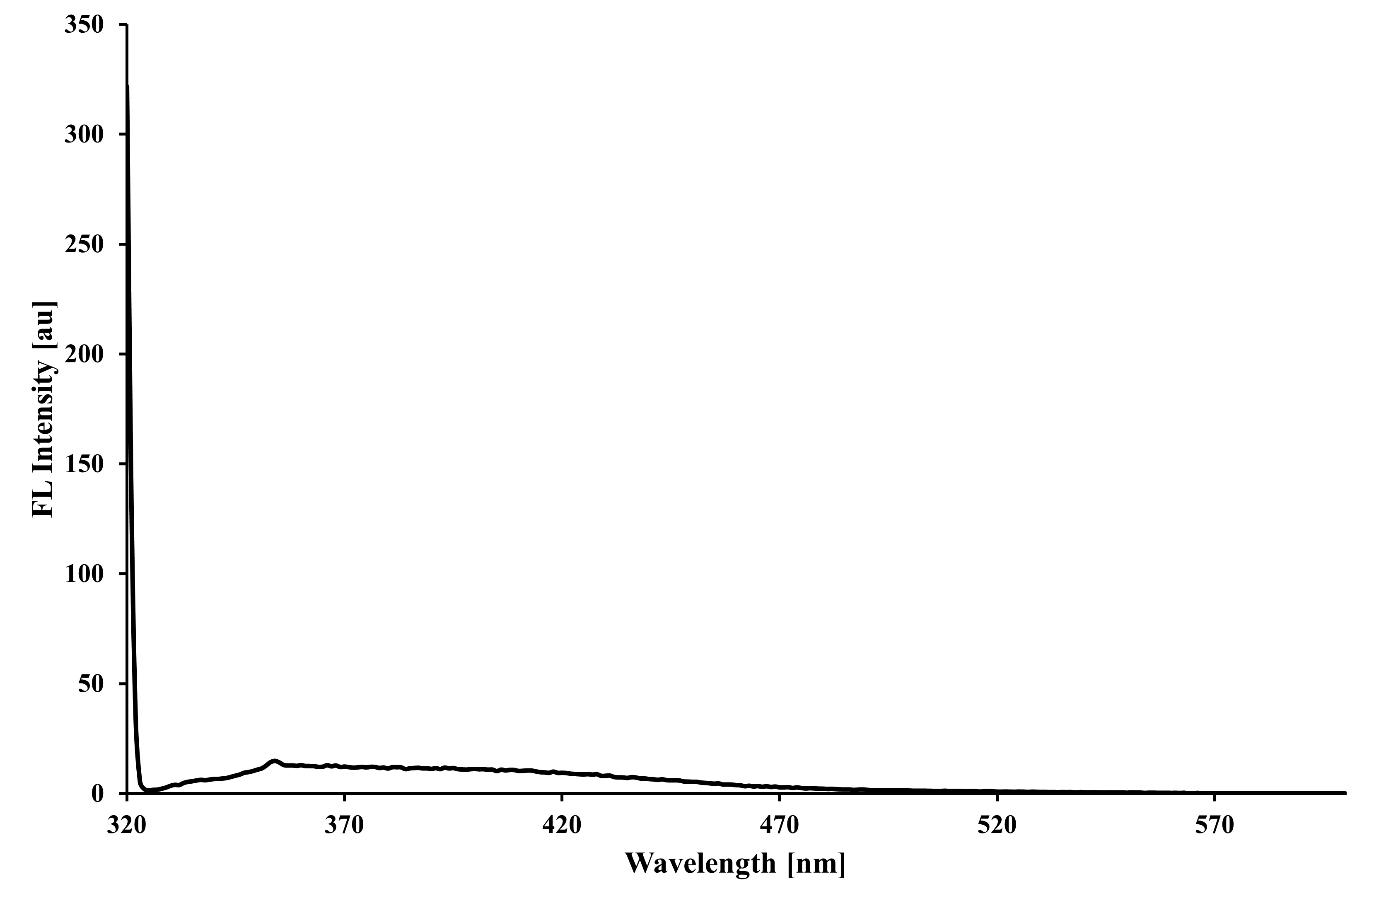


# Figure S12: Emission spectrum of DIN recorded in bromobenzene


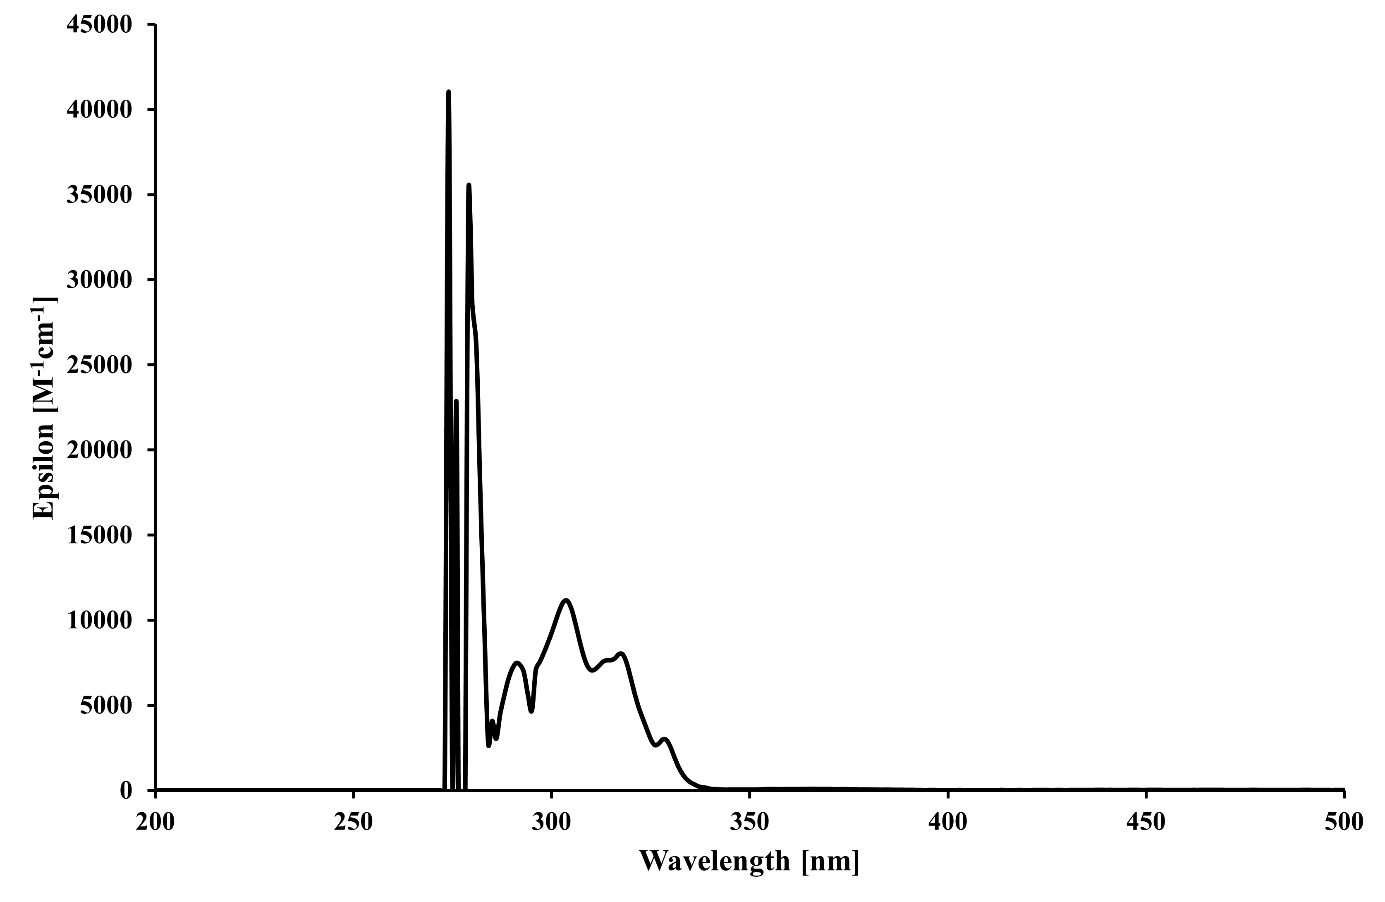


# Figure S13: UV-Vis absorbance spectrum of DIN recorded in chlorobenzene


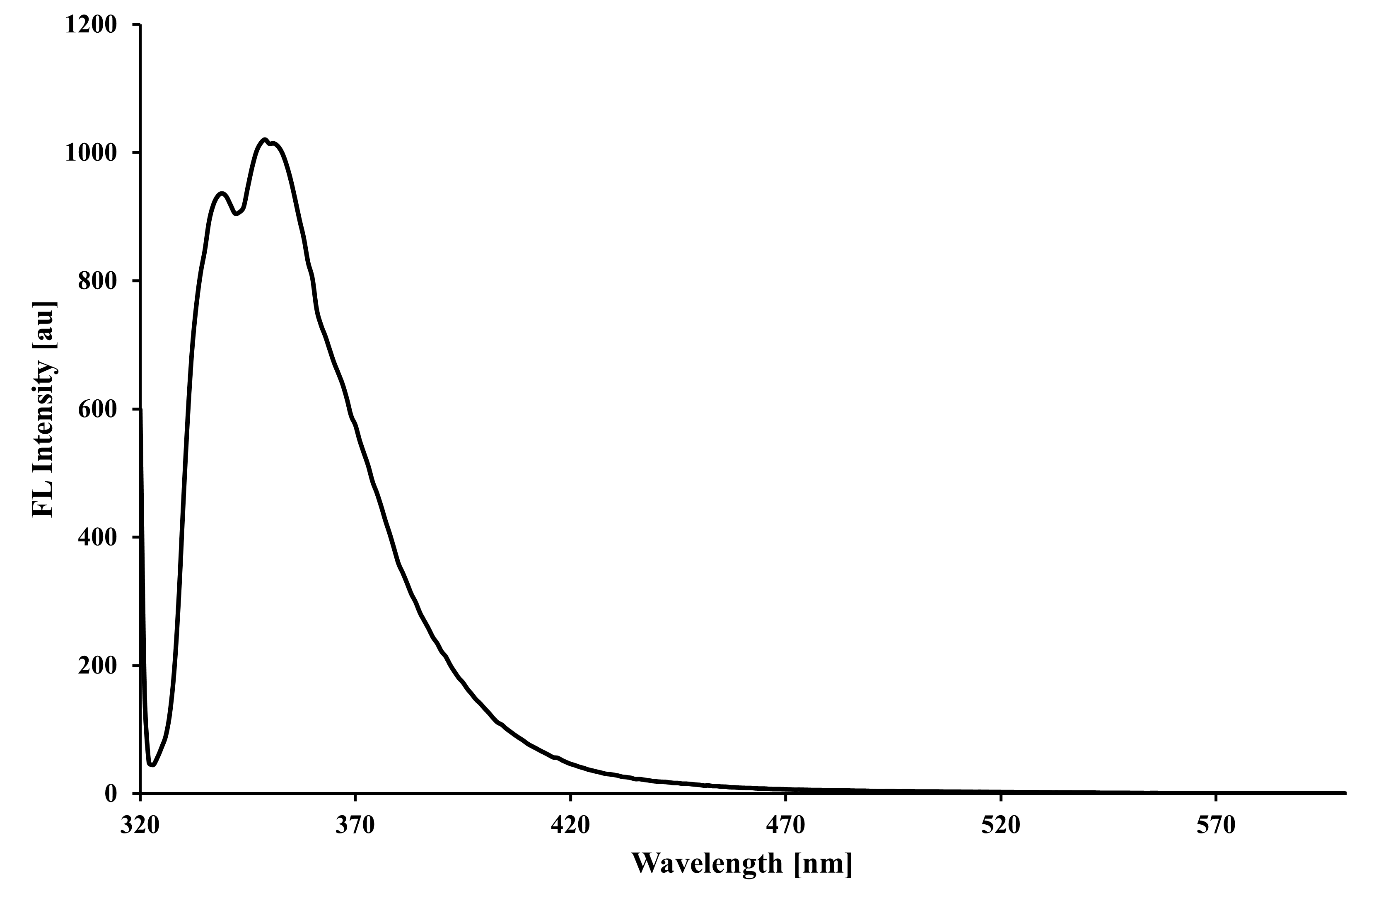


# Figure S14: Emission spectrum of DIN recorded in chlorobenzene


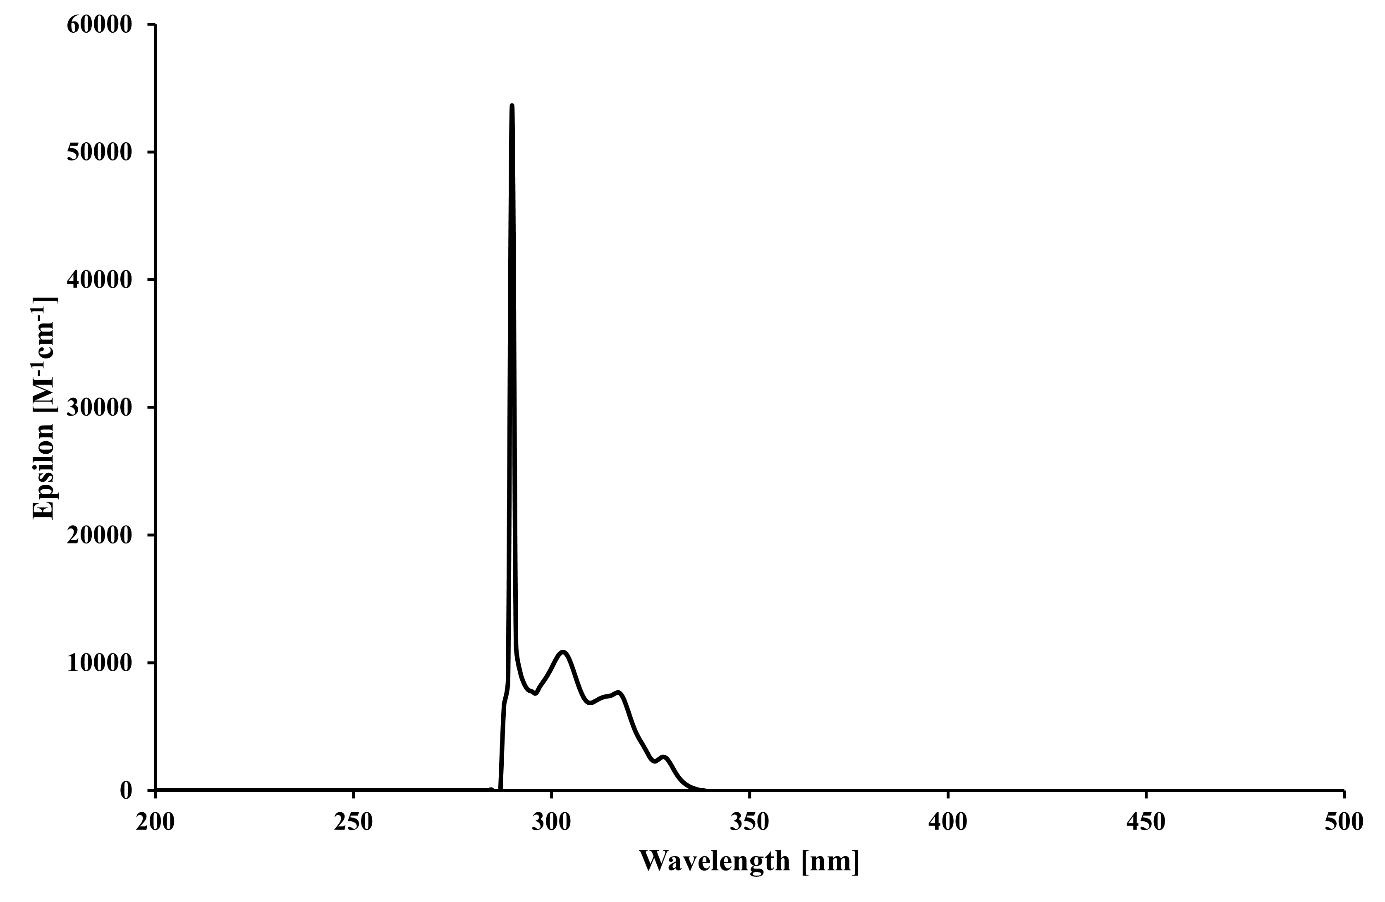


# Figure S15: UV-Vis absorbance spectrum of DIN recorded in ethylbenzene


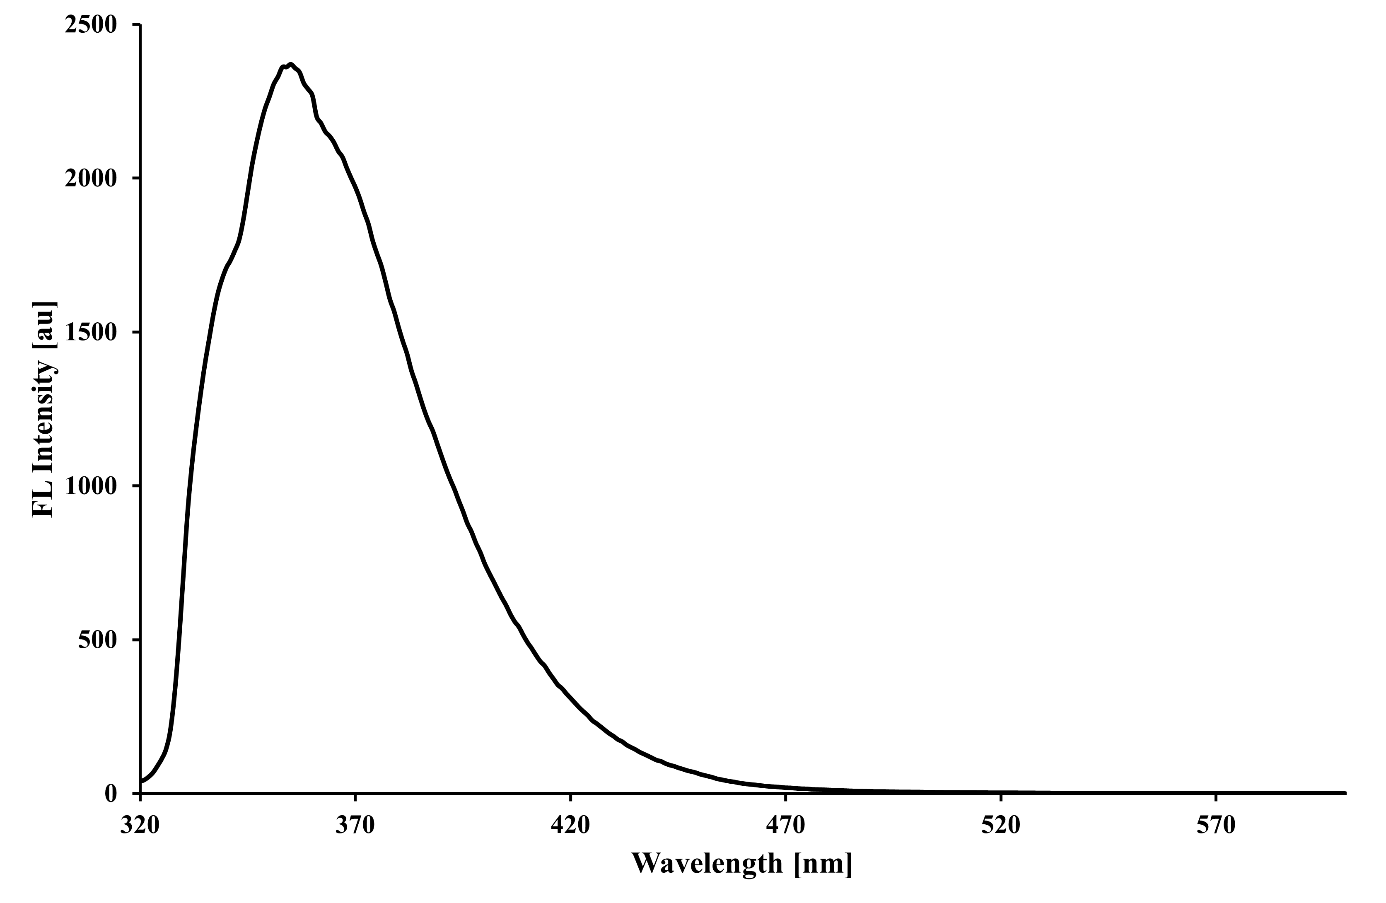


# Figure S16: Emission spectrum of DIN recorded in ethylbenzene


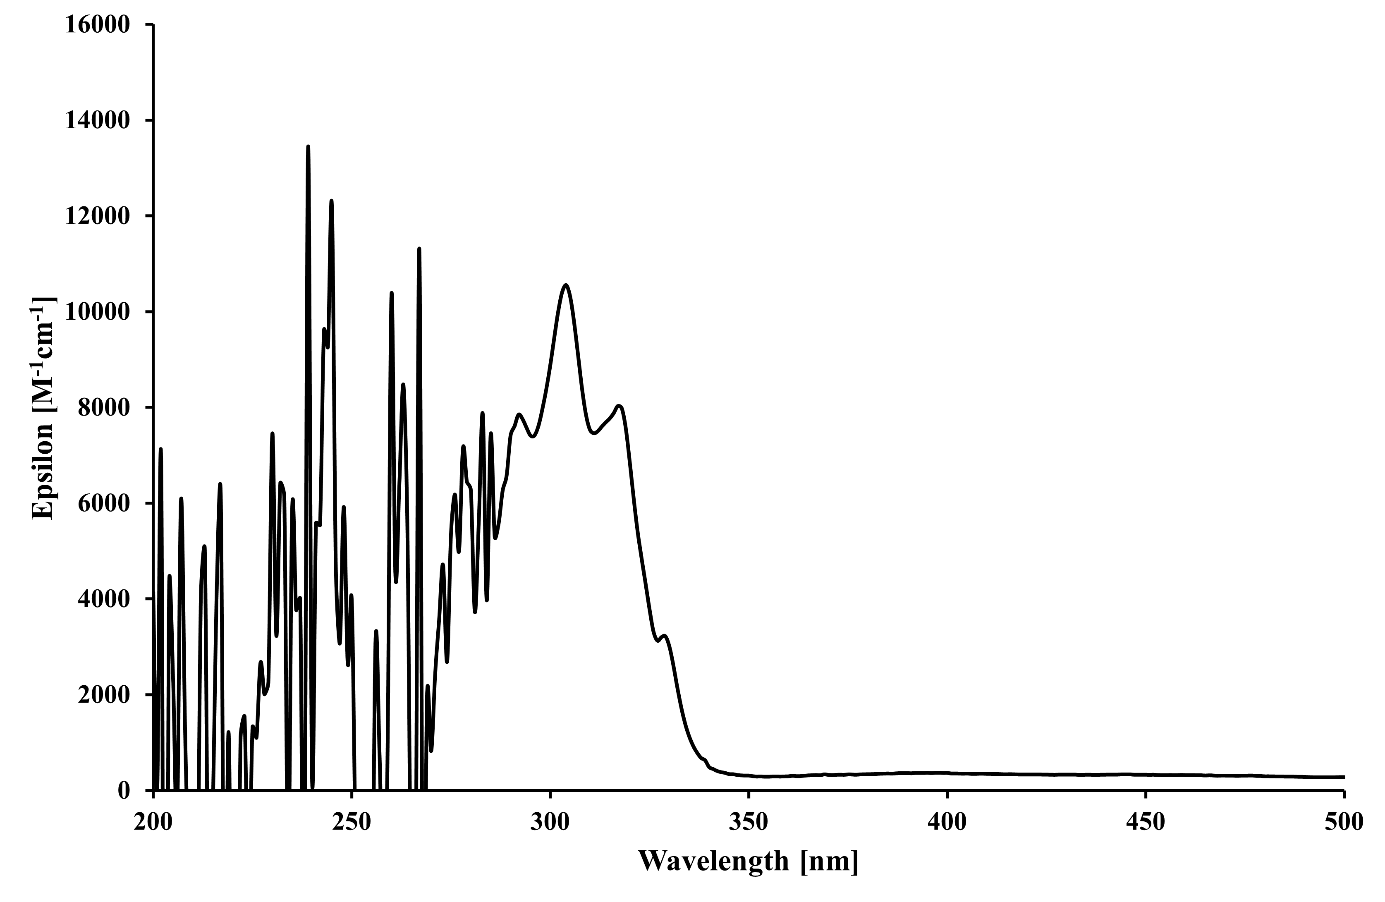


# Figure S17: UV-Vis absorbance spectrum of DIN recorded in m-xylene


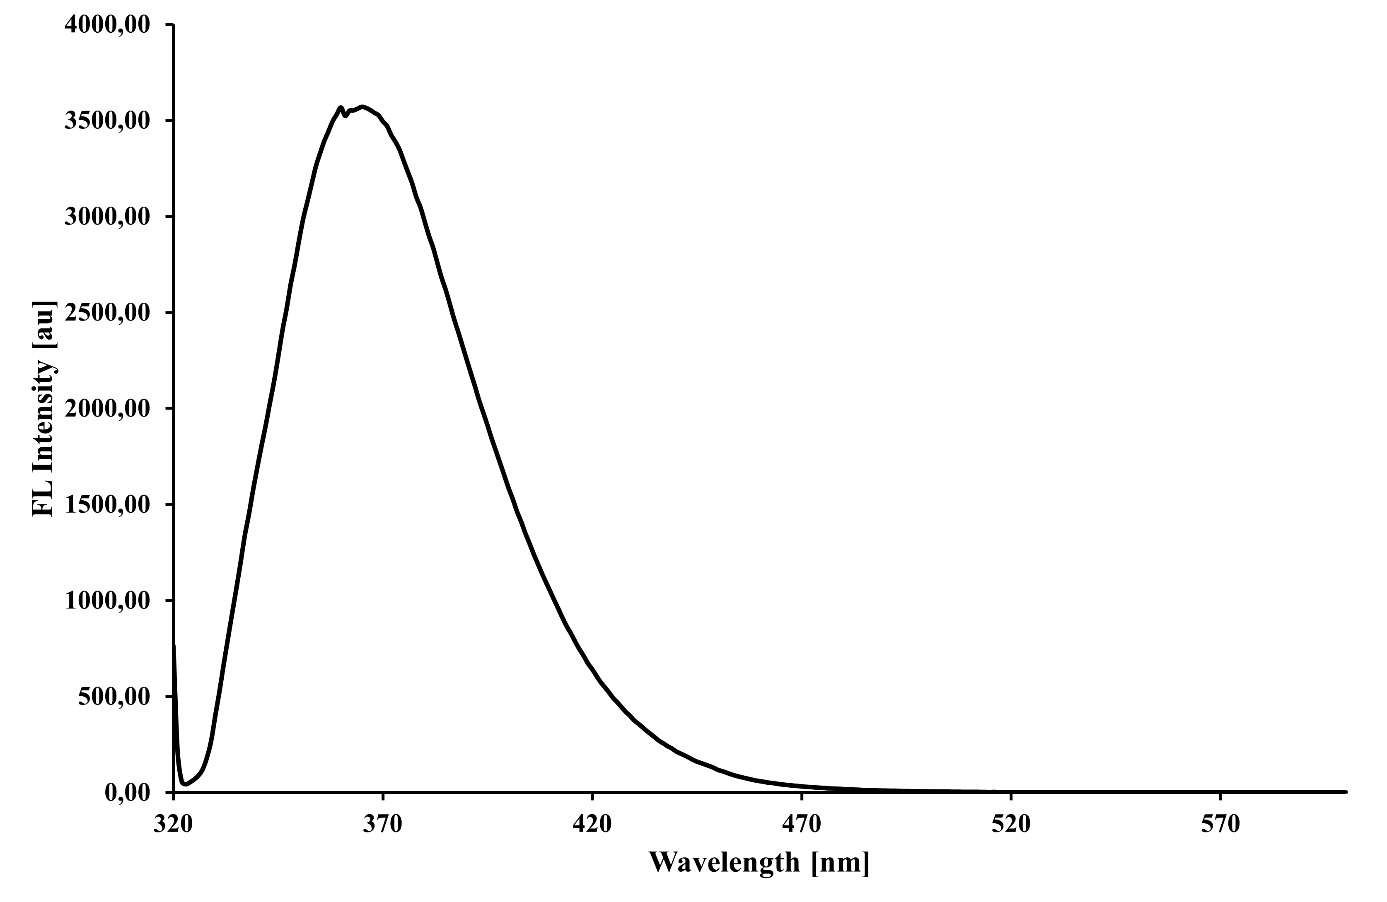


# Figure S18: Emission spectrum of DIN recorded in m-xylene


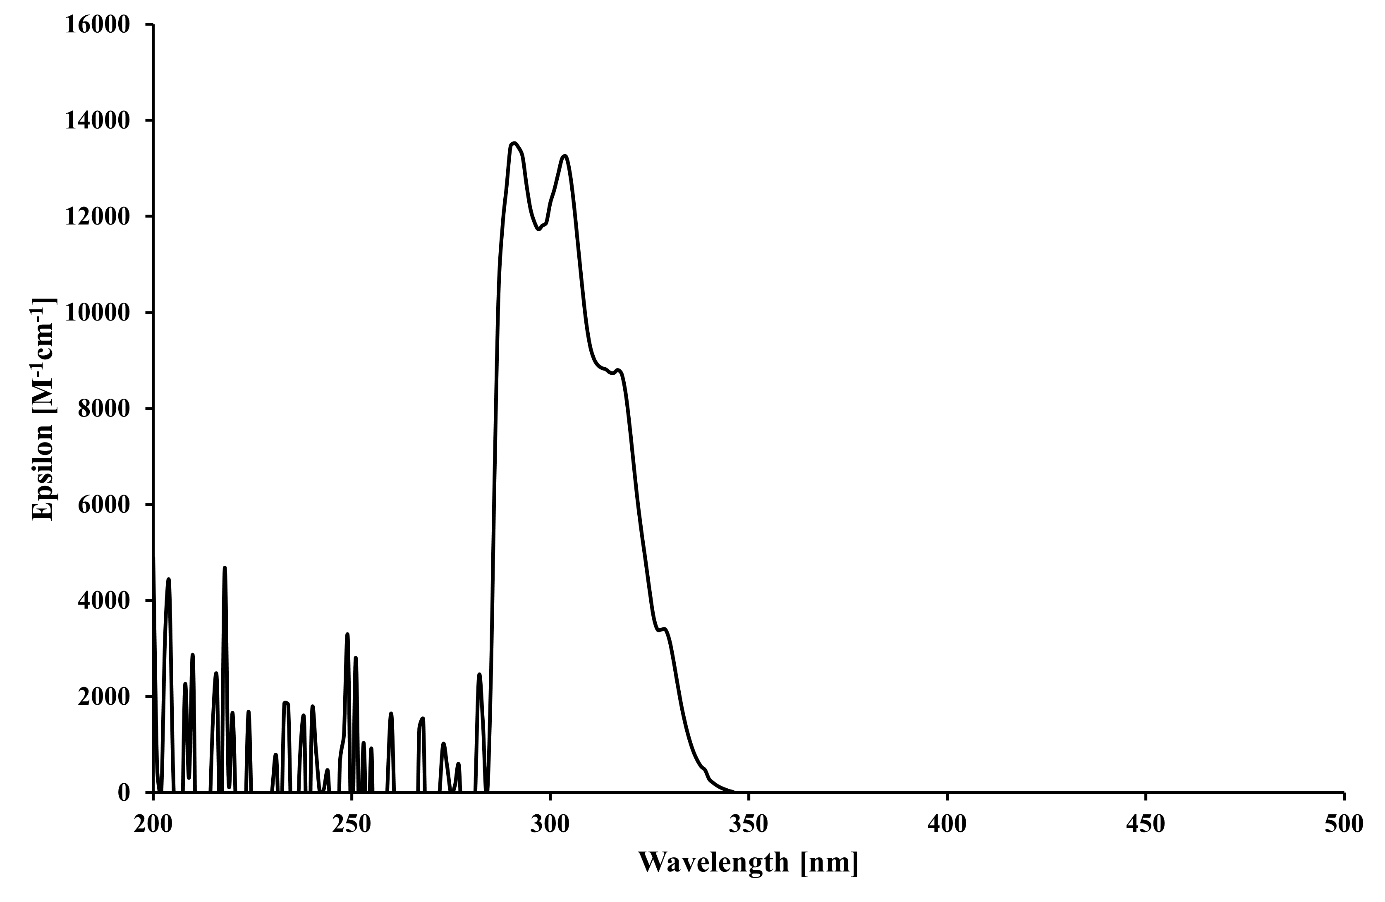


# Figure S19: UV-Vis absorbance spectrum of DIN recorded in o-xylene


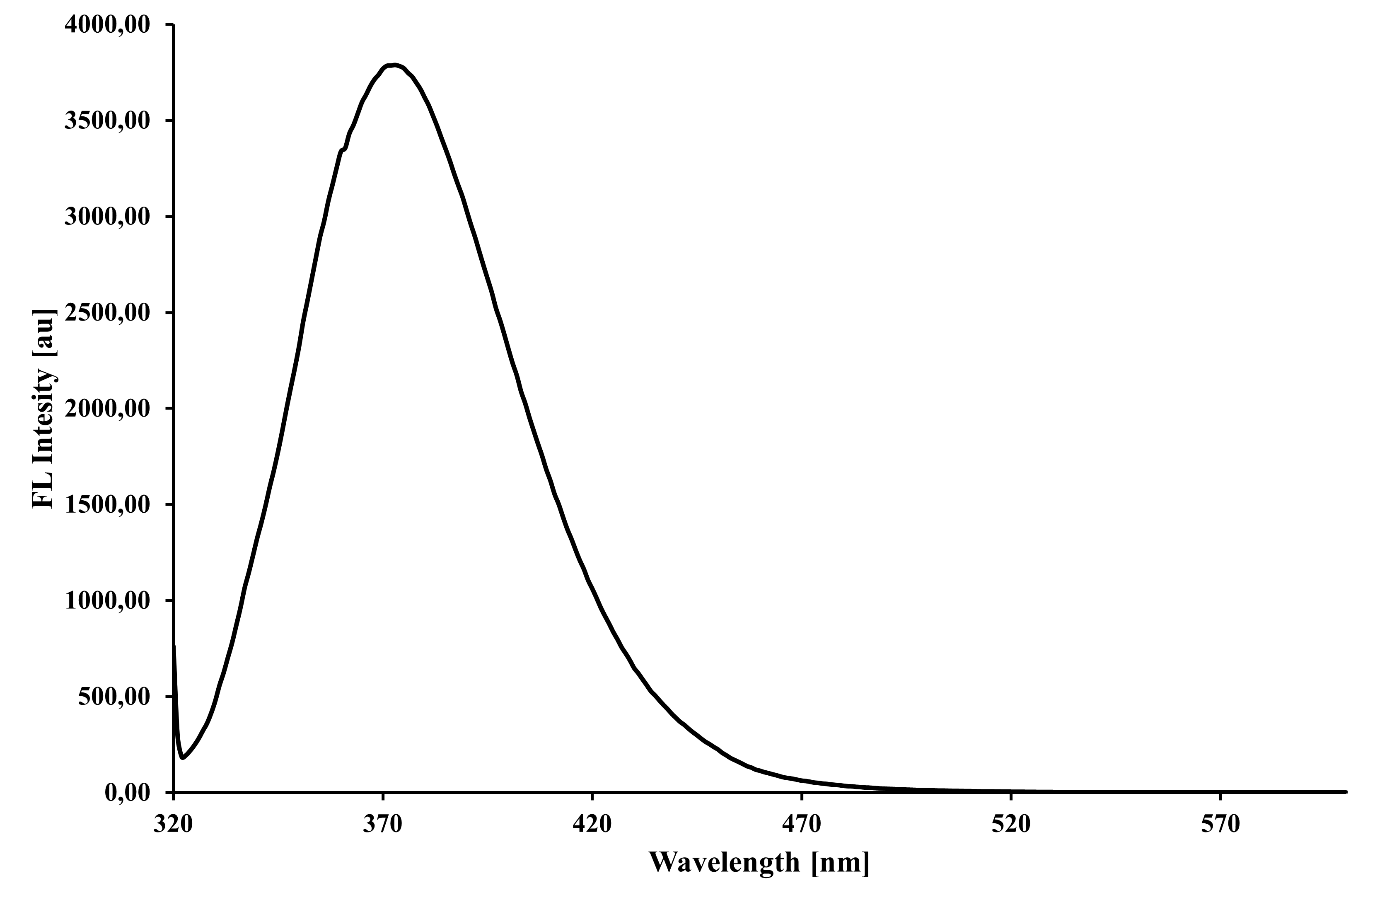


# Figure S20: Emission spectrum of DIN recorded in o-xylene


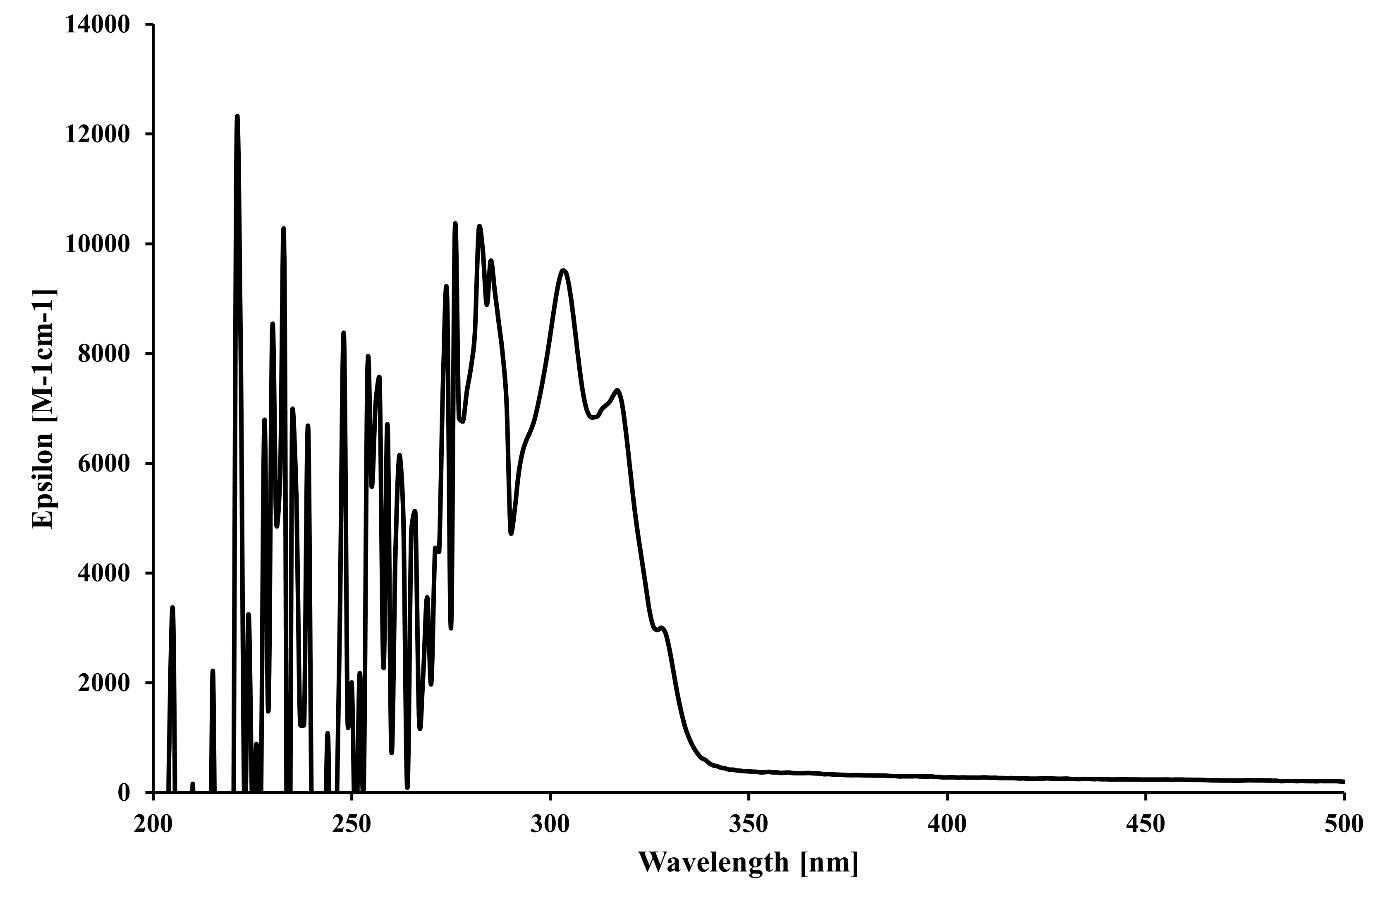


# Figure S21: UV-Vis absorbance spectrum of DIN recorded in p-xylene


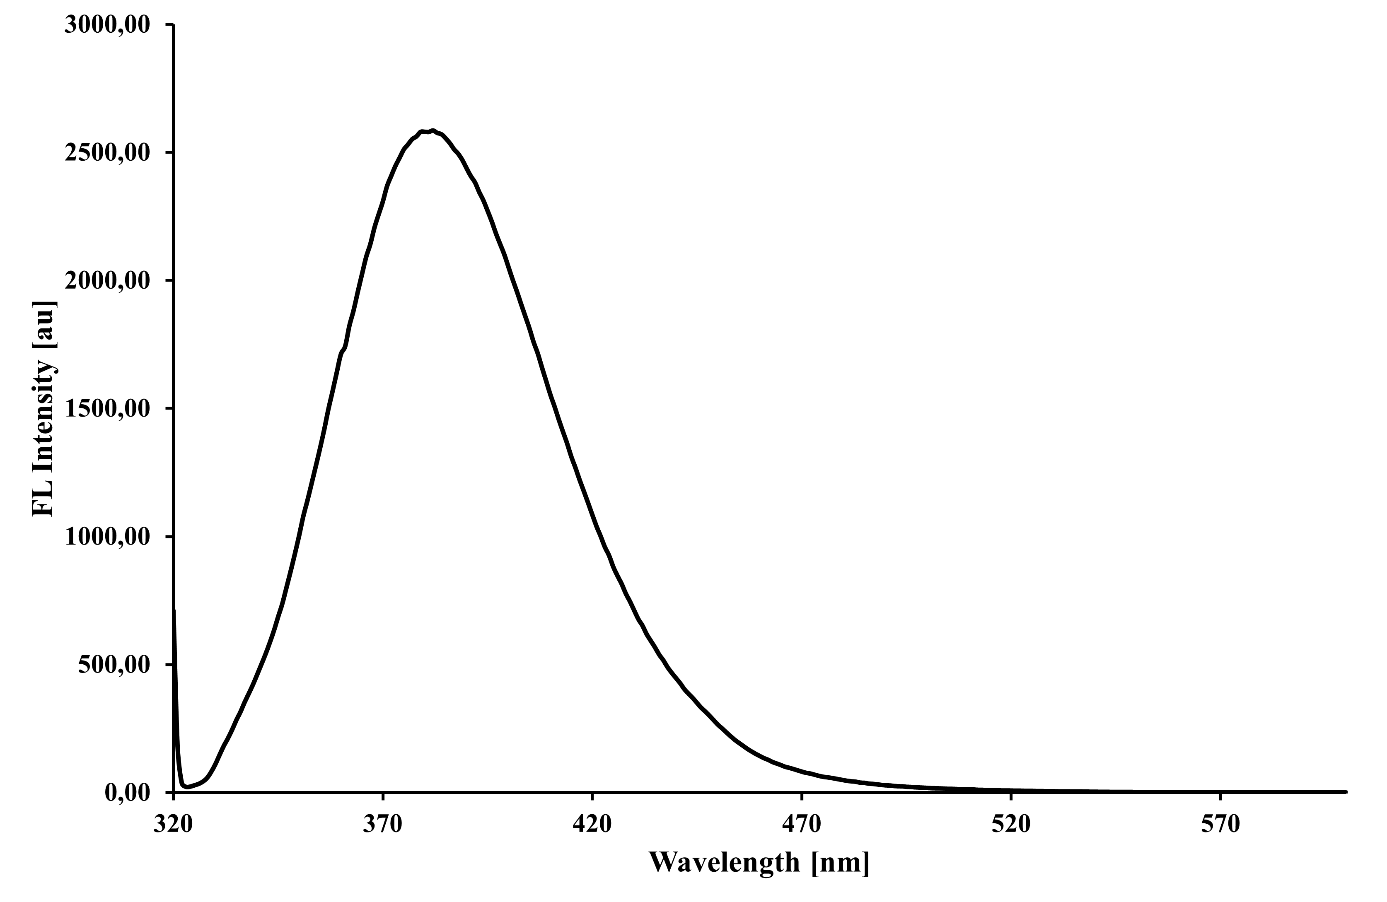


# Figure S22: Emission spectrum of DIN recorded in p-xylene


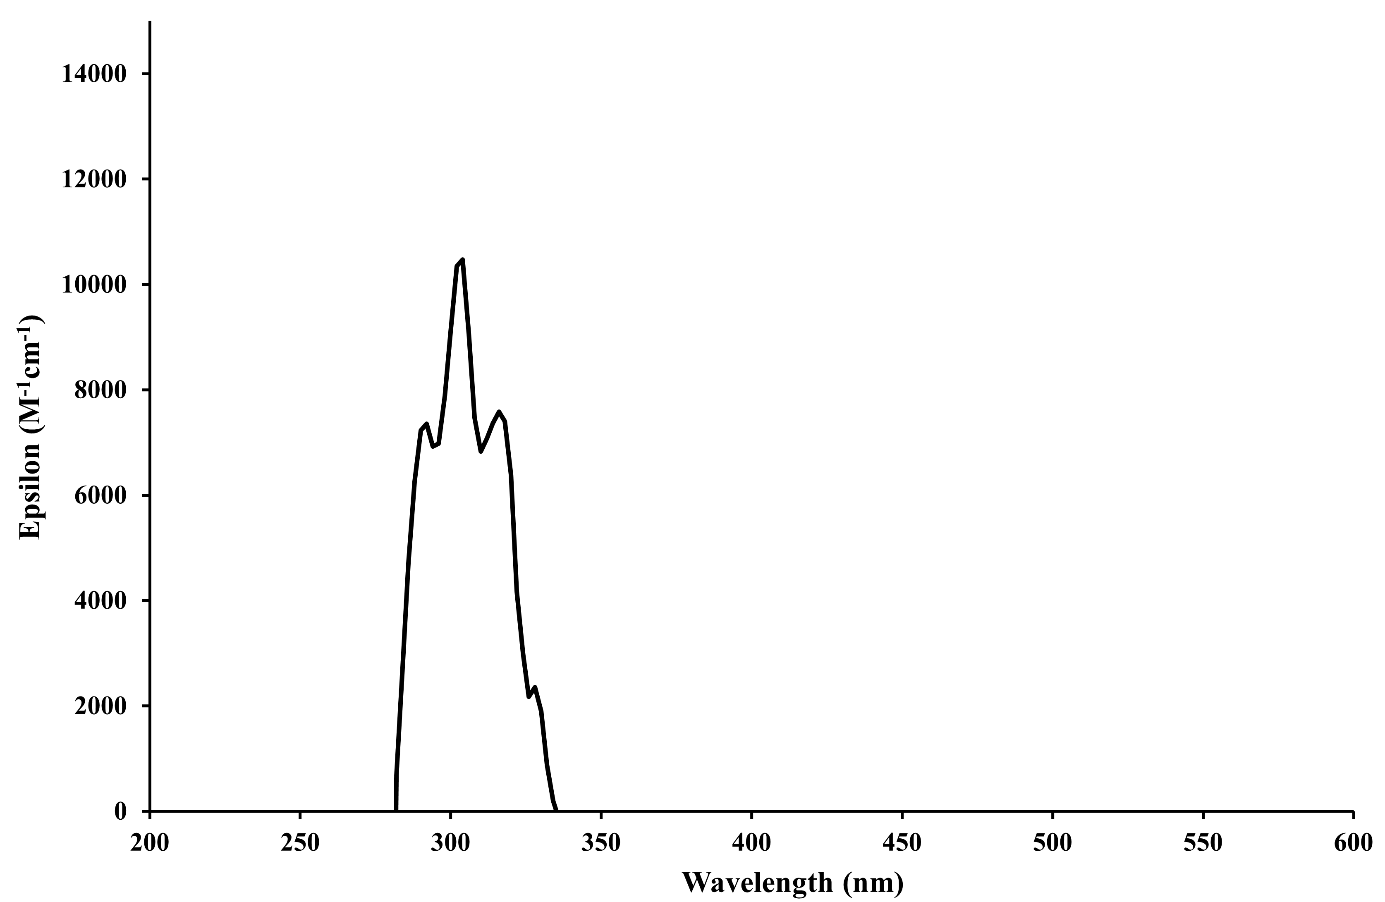


# Figure S23: UV-Vis absorbance spectrum of DIN recorded in toluene


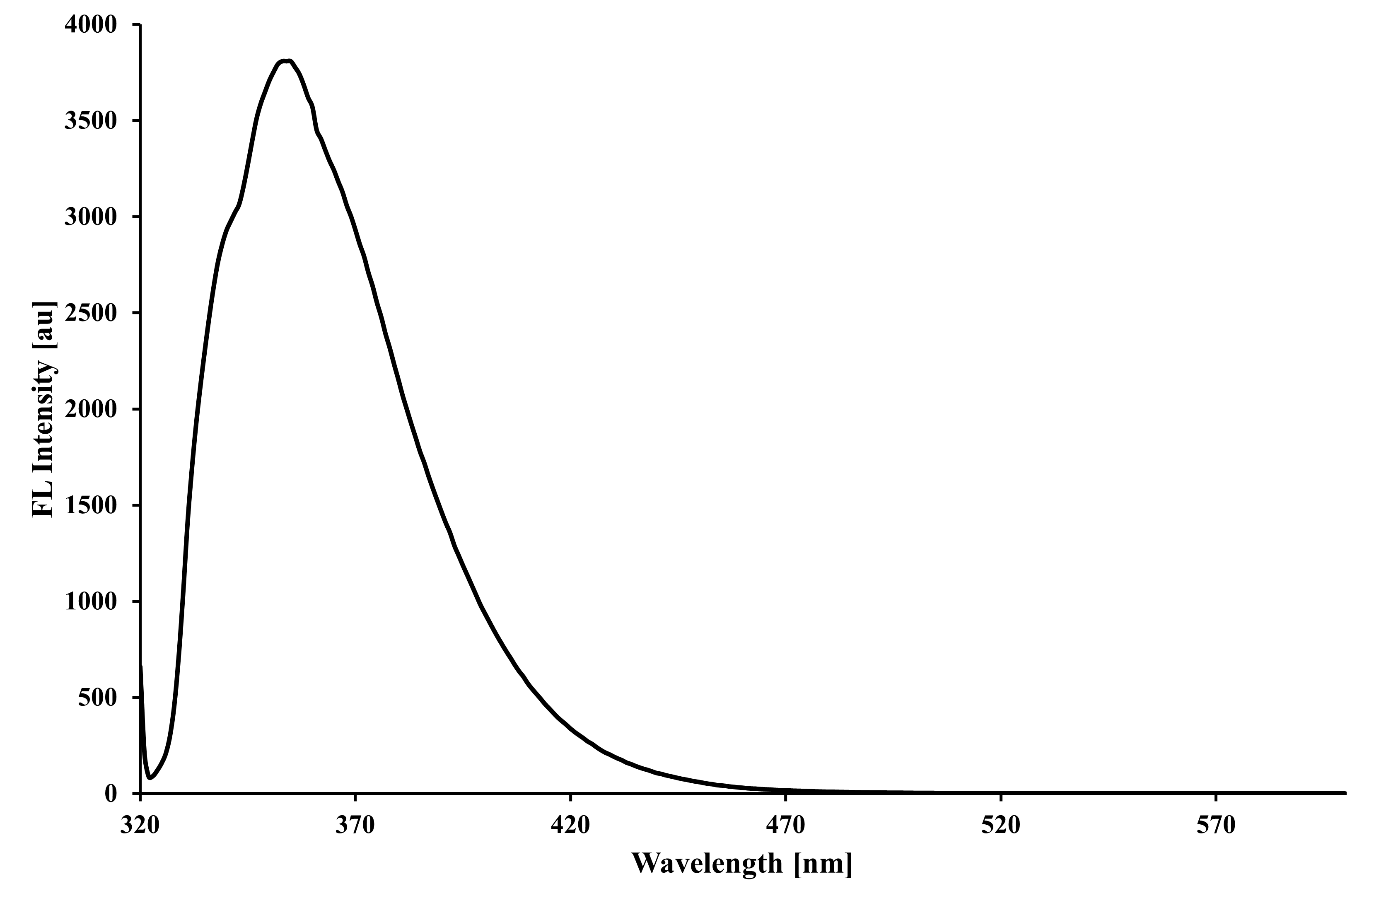


# Figure S24: Emission spectrum of DIN recorded in toluene
